# Supplementary material for: An Explorative Study of the Causal Pathogenesis of Green Liver Discoloration in Organically Reared Female Bronze Turkeys (Meleagris gallopavo) Considering the Infectious Risk Factors
Source: MDPI journal article supplement (doi:10.3390/ani13050918), 2023-03-03
Supplement: s1 [file s1]

**Table S1.** Anamnestic data of Bronze turkey hens of a Cartier genetic from five organic turkey farms (two trials each)

| <b>Flock no.</b>                  | <b>11</b> |            | <b>21</b>          |                  | <b>22</b>        |                  | <b>31</b>        |                    | <b>41</b>                 |                                     |
|-----------------------------------|-----------|------------|--------------------|------------------|------------------|------------------|------------------|--------------------|---------------------------|-------------------------------------|
| <b>Trial</b>                      | <b>1</b>  | <b>2</b>   | <b>1</b>           | <b>2</b>         | <b>1</b>         | <b>2</b>         | <b>1</b>         | <b>2</b>           | <b>1</b>                  | <b>2</b>                            |
| Total count <sup>1</sup>          | 18/20     | 20/20      | 20/20              | 11/20            | 20/20            | 20/20            | 19/ <sup>2</sup> | 20/20              | 19/ <sup>2</sup>          | 17/19                               |
| Further investigated <sup>1</sup> | 6/6       | 7/8        | 6/8                | 7/6              | 6/8              | 6/6              | 10/ <sup>2</sup> | 7/10               | 6/ <sup>2</sup>           | 6/11                                |
| Green livers during examinations  | no        | yes        | yes                | yes              | yes              | no               | yes              | yes                | no                        | yes                                 |
| access to free-range area         | yes       | to day 115 | yes                | no               | no               | yes              | yes              | yes                | yes                       | yes                                 |
| total mortality (%)               | 4.66      | 4.67       | 7.08               | 1.80             | 4.28             | 5.47             | 10.32            | 7.97               | 1.38                      | 5.60                                |
| vaccinations                      | Er, ND    | Er, ND     | Ec, HEV, ND, TRT   | Ec, HEV, ND, TRT | Ec, HEV, ND, TRT | Ec, HEV, ND, TRT | ND               | ND                 | Ec, Er, ND, ORT, Pas, Sta | Ec, Er, HEV, ND, ORT, Pas, TRT, Sta |
| coccidiosis                       | no        | no         | yes                | no               | yes              | no               | yes              | yes                | no                        | yes                                 |
| coccidiostats                     | no        | no         | yes <sup>3</sup>   | yes <sup>3</sup> | yes <sup>3</sup> | yes <sup>3</sup> | yes <sup>3</sup> | yes <sup>3,4</sup> | no                        | yes <sup>3</sup>                    |
| clostridiosis                     | yes       | no         | yes                | no               | no               | no               | yes              | yes                | no                        | yes                                 |
| antibiotics                       | no        | no         | yes <sup>5,6</sup> | no               | no               | no               | yes <sup>5</sup> | yes <sup>5</sup>   | no                        | yes <sup>5</sup>                    |

Ec = *Escherichia coli*, Er = *Erysipelothrix rhusiopathiae*, HEV = hemorrhagic enteritis virus, ND = Newcastle Disease, ORT = *Ornithobacterium rhinotracheale*, Pas = *Pasteurella multocida*., Sta = *Staphylococcus aureus*, TRT = Turkey rhinotracheitis

<sup>1</sup>Examinations 1/2

<sup>2</sup>no examination

<sup>3</sup>Toltrazuril (Toltra-K 25 mg/ml, Bela-Pharm GmbH & Co. KG, Vechta, Germany)

<sup>4</sup>Amprolium (Eimeryl 200 mg/ml, Virbac Tierarzneimittel GmbH, Bad Oldesloe, Germany)

<sup>5</sup>Amoxicillin Solamocta 697 mg/g, (Dechra Veterinary Products Deutschland GmbH, Aulendorf, Germany)

<sup>6</sup>Tylosin (Pharmasin 100.00 %, Huvepharma N.V., Antwerp, Belgium)

**Table S2.** Nucleotide (nt) and amino acid (aa) sequence identities of detected hemorrhagic enteritis virus at the early fattening period in organic fattened turkeys compared to virulence genes E3 (nt 21247 – 22116 [aa AAX51187.2]) and Fiber (nt 22519-23883 [aa AAX51189.1]) of avirulent turkey hemorrhagic enteritis virus strain Virginia (NCBI acc. no.: AY849321.1) in %.

| NCBI acc. no | Sequence ID | Isolate     | E3 (nt) | E3 (aa) | Fiber (nt) | Fiber (aa) |
|--------------|-------------|-------------|---------|---------|------------|------------|
| OM994418     | GL3111      | Isolate 1   | 99.54   | 98.62   | 99.63      | 99.12      |
| OM994422     | NGL2211     | Isolate 4   | 99.77   | 99.31   | 100.00     | 100.00     |
| OM994423     | NGL2121     | Isolate 5.1 | 99.77   | 99.31   | 100.00     | 100.00     |
| OM994424     | GL2121      | Isolate 5   | 99.77   | 99.31   | 100.00     | 100.00     |
| OM994425     | NGL3121     | Isolate 6.1 | 99.89   | 99.65   | 99.36      | 99.34      |
| OM994426     | GL3121      | Isolate 6   | 99.89   | 99.65   | 99.71      | 99.34      |

**Table S3.** Nucleotide (nt) and amino acid (aa) sequence identities of detected hemorrhagic enteritis virus at the early fattening period in organic fattened turkeys compared to virulence gene ORF 1 (nt 313 – 1953 [aa AAX51169.2]) of avirulent turkey hemorrhagic enteritis virus strain Virginia (NCBI acc. no.: AY849321.1) in %.

| NCBI acc. no | Sequence ID | Isolate     | ORF1 (nt) | ORF1 (aa) |
|--------------|-------------|-------------|-----------|-----------|
| OP171872     | GL3111      | Isolate 1   | 99.86     | 100.00    |
| OP171876     | NGL2211     | Isolate 4   | 99.44     | 98.79     |
| OP171877     | NGL2121     | Isolate 5.1 | 99.44     | 98.79     |
| OP171878     | GL2121      | Isolate 5   | 99.51     | 99.20     |
| OP171879     | NGL3121     | Isolate 6.1 | 99.72     | 99.80     |
| OP171880     | GL3121      | Isolate 6   | 99.72     | 99.80     |

**Table S4.** List of samples used for comparative analysis in this study with NCBI accession numbers (acc. no). The table includes several (virulent) field samples as well as commercial vaccine strains against hemorrhagic enteritis (HE). Sorted by authors and publication journals.

| NCBI acc. no | Isolate designation             | Source                 | Type    | Year | Clinical Case                                                                                                   | Publication   |
|--------------|---------------------------------|------------------------|---------|------|-----------------------------------------------------------------------------------------------------------------|---------------|
| OP171872     | Isolate 1                       | Turkey spleen          | Field   | 2020 | High mortality, high relative spleen weight                                                                     | Present study |
| OP171876     | Isolate 4                       | Turkey spleen          | Field   | 2021 | -                                                                                                               |               |
| OP171877     | Isolate 5.1                     | Turkey spleen          | Field   | 2021 | -                                                                                                               |               |
| OP171878     | Isolate 5                       | Turkey spleen          | Field   | 2021 | -                                                                                                               |               |
| OP171879     | Isolate 6.1                     | Turkey spleen          | Field   | 2021 | High mortality, high relative spleen weight, intranuclear inclusion bodies and lymphocytic depletion in spleens |               |
| OP171880     | Isolate 6                       | Turkey spleen          | Field   | 2021 |                                                                                                                 |               |
| AY849321     | Virginia avirulent strain (VAS) | Pheasant spleen        | Vaccine | 2004 | From pheasants with enlarged spleens                                                                            | [51]          |
| DQ868931     | Virulent field isolate 1 (S-1)  | Virginia field isolate | Field   | 2005 | Suspected clinical HE                                                                                           |               |
| DQ868932     | Virulent field isolate 2 (S-2)  | Virginia field isolate | Field   | 2005 | Suspected clinical HE                                                                                           |               |
| DQ868933     | Virulent field isolate 3 (S-3)  | Virginia field isolate | Field   | 2005 | Suspected clinical HE                                                                                           |               |
| DQ868934     | Virulent field isolate 4 (S-4)  | Virginia field isolate | Field   | 2005 | Suspected clinical HE                                                                                           |               |
| DQ868935     | Tissue culture vaccine A (TC-A) | Turkey spleen          | Vaccine | 2005 | -                                                                                                               |               |
| DQ868936     | Tissue culture vaccine B (TC-B) | Commercial             | Vaccine | 1991 | -                                                                                                               |               |
| DQ868937     | Tissue culture vaccine C (TC-C) | Commercial             | Vaccine | 1992 | -                                                                                                               |               |

|          |                                 |                      |         |      |                                  |      |
|----------|---------------------------------|----------------------|---------|------|----------------------------------|------|
| DQ868938 | Tissue culture vaccine D (TC-D) | Commercial           | Vaccine | 1992 | -                                |      |
| DQ868929 | Virginia virulent strain (VVS)  | Turkey spleen        | Field   | 1996 | Clinical HE                      |      |
| DQ868930 | Marble spleen vaccine (MSV)     | Turkey litter        | Vaccine | 1987 | -                                |      |
| MT603863 | H.E.Vac                         | Commercial           | Vaccine | 2020 | -                                |      |
| MT603864 | Oralvax HE                      | Commercial           | Vaccine | 2020 | -                                |      |
| MT603861 | 18-0430-AB-2018                 | Turkey spleen        | Field   | 2018 | Increased Mortality-Cellulitis   | [39] |
| MT603862 | 17-0495-ON-2017                 | Turkey spleen        | Field   | 2017 | Increased Mortality-Surveillance |      |
| AF074946 | Israel virulent strain (IVS)    | Israel field isolate | Field   | 1998 | Unknown                          | [17] |
